# Supplementary material for: Immunogenicity of adalimumab reference product and adalimumab-adbm in patients with rheumatoid arthritis, Crohn’s disease and chronic plaque psoriasis: a pooled analysis of the VOLTAIRE trials
Source: HighWire-hosted journal article supplement (doi:10.1136/bmjopen-2023-081687), 2024-11-01
Supplement: bmjopen-2023-081687supp001_data_supplement.pdf [file bmjopen-2023-081687supp001_data_supplement.pdf]

<SUPPLEMENTAL MATERIAL>

Table S1 Antibody development in the men and women of VOLTAIRE-RA

| Status                                                      | Adalimumab-adbm (n=324) |                      | Adalimumab RP (n=321) |                       |
|-------------------------------------------------------------|-------------------------|----------------------|-----------------------|-----------------------|
|                                                             | Men (n=57)              | Women (n=267)        | Men (n=52)            | Women (n=269)         |
| <b>Antibody first detectable</b>                            |                         |                      |                       |                       |
| ADA                                                         | Week 1                  | Baseline             | Baseline              | Baseline              |
| nAb                                                         | Week 2                  | Baseline             | Baseline              | Baseline              |
| ADA titre at primary endpoint, mean (SD)<br>[median: Q1,Q3] | 27.7 (37.0) at W12      | 58.0 (98.7) at W12   | 503.3 (1922.6) at W12 | 322.8 (1084.6) at W12 |
|                                                             | [8: 4, 32]              | [16: 4, 64]          | [6: 6,64]             | [16: 4, 64]           |
|                                                             | 122.8 (250.0) at W24    | 168.4 (804.2) at W24 | 195.4 (339.4) at W24  | 315.6 (1704.3) at W24 |
|                                                             | [32: 4, 64]             | [32: 8, 128]         | [64: 16, 64]          | [32: 8, 128]          |
| <b>Proportion of patients with antibodies over time*</b>    |                         |                      |                       |                       |
| ADA positive                                                |                         |                      |                       |                       |
| Baseline                                                    | 0% (0/57)               | 4.1% (11/266)        | 11.5% (6/52)          | 5.6% (15/269)         |
| Week 1                                                      | 1.9% (1/53)             | 6.4% (17/264)        | 15.7% (8/51)          | 8.1% (21/260)         |
| Week 2                                                      | 3.8% (2/53)             | 11.3% (30/265)       | 13.7% (7/51)          | 16.5% (44/267)        |
| Week 4                                                      | 12.7% (7/55)            | 21.6% (57/264)       | 23.5% (12/51)         | 19.2% (51/265)        |
| Week 12                                                     | 24.5% (13/53)           | 34.0% (88/259)       | 38.3% (18/47)         | 34.2% (88/257)        |
| Week 24                                                     | 38.0% (19/50)           | 44.7% (110/246)      | 53.2% (25/47)         | 46.9% (119/254)       |
| Week 40                                                     | 37.0% (17/46)           | 42.5% (102/240)      | 52.3% (23/44)         | 43.4% (105/242)       |
| Week 48                                                     | 37.5% (18/48)           | 42.8% (101/236)      | 51.2% (22/43)         | 41.0% (98/239)        |
| nAb positive                                                |                         |                      |                       |                       |
| Baseline                                                    | 0% (0/57)               | 3.4% (9/266)         | 9.6% (5/52)           | 4.1% (11/269)         |
| Week 1                                                      | 0% (0/53)               | 3.4% (9/264)         | 5.9% (3/51)           | 4.2% (11/260)         |
| Week 2                                                      | 1.9% (1/53)             | 3.4% (9/265)         | 13.7% (7/51)          | 6.7% (18/267)         |
| Week 4                                                      | 3.6% (2/55)             | 7.2% (19/264)        | 9.8% (5/51)           | 7.2% (19/265)         |
| Week 12                                                     | 7.5% (4/53)             | 13.5% (35/259)       | 21.3% (10/47)         | 16.0% (41/257)        |
| Week 24                                                     | 14.0% (7/50)            | 16.7% (41/246)       | 25.5% (12/47)         | 20.1% (51/254)        |
| Week 40                                                     | 6.5% (3/46)             | 14.2% (34/240)       | 20.5% (9/44)          | 16.1% (39/242)        |
| Week 48                                                     | 14.6% (7/48)            | 20.3% (48/236)       | 25.6% (11/43)         | 16.3% (39/239)        |

\*Reported in the randomised population at baseline.

ADA, anti-drug antibody; nAb, neutralising antibody; RA, rheumatoid arthritis; RP, reference product; SD, standard deviation; W, week.

Table S2 Antibody development in the men and women of VOLTAIRE-CD

| Status                                                       | Adalimumab-adbm (n=72)                  |                                   | Adalimumab RP (n=75)               |                                |
|--------------------------------------------------------------|-----------------------------------------|-----------------------------------|------------------------------------|--------------------------------|
|                                                              | Men (n=39)                              | Women (n=33)                      | Men (n =44 )                       | Women (n=31)                   |
| Antibody first detectable                                    |                                         |                                   |                                    |                                |
| ADA                                                          | Baseline                                | Baseline                          | Week 4                             | Week 4                         |
| nAb                                                          | Week 4                                  | Week 4                            | Week 24                            | Week 4                         |
| ADA titre at primary endpoint, mean (SD)<br>[median: Q1, Q3] | 1095.0 (2873.0) at W4<br>[10: 1.5, 272] | 51.7 (100.3) at W4<br>[16: 4, 16] | 32.5 (44.6) at W4<br>[32.5: 1, 64] | 2.5 (2.1) at W4<br>[10: 3, 16] |
| Proportion of patients with antibodies over time             |                                         |                                   |                                    |                                |
| ADA positive                                                 |                                         |                                   |                                    |                                |
| Baseline                                                     | 5.4% (2/37)                             | 3.1% (1/32)                       | 0% (0/43)                          | 0% (0/31)                      |
| Week 4                                                       | 21.6% (8/37)                            | 19.4% (6/31)                      | 4.8% (2/42)                        | 6.5% (2/31)                    |
| Week 24                                                      | 65.6% (21/32)                           | 74.1% (20/27)                     | 32.4% (11/34)                      | 63.0% (17/27)                  |
| Week 48                                                      | 64.3% (18/28)                           | 62.5% (15/24)                     | 37.5% (12/32)                      | 70.8% (17/24)                  |
| nAb positive                                                 |                                         |                                   |                                    |                                |
| Baseline                                                     | 0% (0/37)                               | 0% (0/32)                         | 0% (0/43)                          | 0% (0/31)                      |
| Week 4                                                       | 10.8% (4/37)                            | 6.5% (2/31)                       | 0% (0/42)                          | 6.5% (2/31)                    |
| Week 24                                                      | 31.3% (10/32)                           | 40.7% (11/27)                     | 14.7% (5/34)                       | 33.3% (9/27)                   |
| Week 48                                                      | 25.0% (7/28)                            | 25.0% (6/24)                      | 15.6% (5/32)                       | 25.0% (6/24)                   |

ADA, anti-drug antibody; CD, Crohn’s disease; nAb, neutralising antibody; RP, reference product; SD, standard deviation; W, week.

**Table S3.** Antibody development in the men and women of VOLTAIRE-PsO.

| Status                                                  | Adalimumab-adbm (n=159)        |                              | Adalimumab RP (n=158)        |                               |
|---------------------------------------------------------|--------------------------------|------------------------------|------------------------------|-------------------------------|
|                                                         | Men (n=101)                    | Women (n=58)                 | Men (n=102)                  | Women (n=56)                  |
| <b>Antibody first detectable</b>                        |                                |                              |                              |                               |
| ADA                                                     | Baseline                       | Baseline                     | Baseline                     | Baseline                      |
| nAb                                                     | Baseline                       | Week 16                      | Baseline                     | Baseline                      |
| ADA titre at primary endpoint, median (range) [Q1, Q3]  | 32 (1–16,384) at W16 [16, 128] | 48 (1–1024) at W16 [32, 128] | 32 (2–2048) at W16 [16, 128] | 32 (2–16,384) at W16 [16, 64] |
| <b>Proportion of patients with antibodies over time</b> |                                |                              |                              |                               |
| <b>ADA positive</b>                                     |                                |                              |                              |                               |
| Baseline                                                | 12.9% (13/101)                 | 6.9% (4/58)                  | 12.7% (13/102)               | 7.1% (4/56)                   |
| Week 16                                                 | 69.9% (65/93)                  | 65.5% (36/55)                | 68.0% (96/97)                | 78.8% (41/52)                 |
| Week 24                                                 | 76.8% (73/95)                  | 72.7% (40/55)                | 76.1% (70/92)                | 81.1% (43/53)                 |
| <b>nAb positive</b>                                     |                                |                              |                              |                               |
| Baseline                                                | 1.0% (1/101)                   | 0% (0/58)                    | 2.0% (2/102)                 | 1.8% (1/56)                   |
| Week 16                                                 | 54.8% (51/93)                  | 52.7% (29/55)                | 50.5% (49/97)                | 65.4% (34/52)                 |
| Week 24                                                 | 54.7% (52/95)                  | 49.1% (27/55)                | 52.2% (48/92)                | 66.0% (35/53)                 |

ADA, anti-drug antibody; nAb, neutralising antibody; PsO, chronic plaque psoriasis; RP, reference product; W, week.
